# Supplementary material for: Group A rotavirus surveillance before vaccine introduction in Italy, September 2014 to August 2017
Source: PubMed Central journal article supplement (PMC6470368; doi:10.2807/1560-7917.es.2019.24.15.1800418), 2019-04-11
Supplement: 1800418_IANIRO_SupplementS1.pdf [file 1800418_IANIRO_SupplementS1.pdf]

Supplement 1.

RotaNet-Italy surveillance questionnaire provided to all hospitals involved in the surveillance net, and sent back to ISS in association to each fecal sample.

This supplementary material is hosted by Eurosurveillance as supporting information alongside the article "Group A rotavirus surveillance before vaccine introduction in Italy, 2014 to 2017" on behalf of the authors who remain responsible for the accuracy and appropriateness of the content. The same standards for ethics, copyright, attributions and permissions as for the article apply. Eurosurveillance is not responsible for the maintenance of any links or email addresses provided therein.

Date \_\_\_/\_\_\_/\_\_\_

## Rotavirus Surveillance

Country \_\_\_\_\_ City \_\_\_\_\_ Hospital code \_\_\_\_\_

Sample code \_\_\_\_\_ Sex \_\_\_\_\_

City of birth \_\_\_\_\_ Date of birth \_\_\_/\_\_\_/\_\_\_

City of residence \_\_\_\_\_ Living setting Urban  Rural

Ward of admission \_\_\_\_\_ Hospital address \_\_\_\_\_

Cause of admission \_\_\_\_\_ Date of admission \_\_\_/\_\_\_/\_\_\_

Nosocomial infection Yes  No

### Symptoms:

Fever (>38°C): Yes  No

Diarrhea: > 3 discharge/day  < 3 discharge/day  No

Vomit: Yes  No

Abdominal pain: Yes  No

Rotavirus vaccination Yes  No  Dose \_\_\_\_\_ Vaccine used \_\_\_\_\_

Other symptoms: \_\_\_\_\_

Other recent vaccinations: \_\_\_\_\_

Other cases (house or school): \_\_\_\_\_

Date of collection of feces: \_\_\_/\_\_\_/\_\_\_

Name of the physician \_\_\_\_\_

Phone \_\_\_\_\_ fax \_\_\_\_\_ E-mail \_\_\_\_\_
